# Supplementary material for: Impact of housing conditions on changes in youth’s mental health following the initial national COVID-19 lockdown: A cohort study
Source: bioRxiv or medRxiv preprint supplement (doi:10.1101/2020.12.16.20245191), 2020-12-22

## **eSupplement**

**Table of Contents**, page 1

### **eTables**

**eTable 1.** Changes in mental well-being (No. = 7445), page 2

**eTable 2.** Onset of low mental well-being (No. = 6537), page 3

**eTable 3.** Changes in quality of life (No. = 7445), page 4

**eTable 4.** Onset of low quality of life (No. = 6283), page 5

**eTable 5.** Onset of loneliness (No. = 6418), page 6

**eTable 6.** Changes in mental well-being, quality of life and loneliness, stratified by sex (No. = 7445), page 7

**eTable 7.** Joint effects of housing conditions and quarantine on changes in mental well-being, quality of life and loneliness (No. = 7418), page 8

**eTable 8.** Changes in quality of life, stratified by psychiatric illnesses (No. = 7418), page 9

**eTable 9.** Changes in category of mental well-being (No. = 7445), page 10

**eTable 10.** Changes in category of quality of life (No. = 7445), page 11

**eTable 11.** Changes in category of loneliness (No. = 7445), page 12

### **eFigures**

**eFigure 1.** Flow of participation, page 13

**eTable 1.** Changes in mental well-being (No. = 7445)

|                                        | no.  | Mean difference (95 % CI) |                     |                     |
|----------------------------------------|------|---------------------------|---------------------|---------------------|
|                                        |      | Crude Model               | Adjusted model 1    | Adjusted model 2    |
| <b>Direct access to outdoor spaces</b> |      |                           |                     |                     |
| None                                   | 286  | -0.68 [-1.03,-0.33]       | -0.91 [-1.24,-0.59] | -0.83 [-1.19,-0.48] |
| Common yard                            | 464  | 0.15 [-0.13,0.44]         | -0.14 [-0.41,0.12]  | -0.12 [-0.40,0.17]  |
| Balcony                                | 459  | 0.17 [-0.11,0.45]         | -0.07 [-0.33,0.20]  | -0.04 [-0.32,0.24]  |
| Garden                                 | 4346 | 0.00 [0.00,0.00]          | 0.00 [0.00,0.00]    | 0.00 [0.00,0.00]    |
| Multiple outdoor spaces                | 1889 | 0.09 [-0.07,0.25]         | -0.00 [-0.15,0.14]  | 0.00 [-0.15,0.15]   |
| <b>Urban</b>                           |      |                           |                     |                     |
| Urban                                  | 2698 | -0.05 [-0.21,0.10]        | -0.16 [-0.32,0.00]  | -0.13 [-0.30,0.03]  |
| Semi-urban                             | 1602 | -0.08 [-0.25,0.10]        | -0.16 [-0.33,0.02]  | -0.15 [-0.32,0.02]  |
| Rural                                  | 3145 | 0.00 [0.00,0.00]          | 0.00 [0.00,0.00]    | 0.00 [0.00,0.00]    |
| <b>Household density</b>               |      |                           |                     |                     |
| Below median                           | 3988 | 0.00 [0.00,0.00]          | 0.00 [0.00,0.00]    | 0.00 [0.00,0.00]    |
| Above median                           | 3457 | -0.18 [-0.32,-0.05]       | -0.29 [-0.41,-0.16] | -0.30 [-0.43,-0.18] |
| <b>Household composition</b>           |      |                           |                     |                     |
| Alone                                  | 436  | -0.17 [-0.47,0.12]        | -0.49 [-0.76,-0.21] | -0.25 [-0.56,0.05]  |
| Roomies/friends                        | 410  | 0.12 [-0.18,0.43]         | -0.02 [-0.31,0.26]  | 0.14 [-0.17,0.45]   |
| Partner                                | 835  | 0.30 [0.07,0.53]          | 0.11 [-0.10,0.33]   | 0.23 [0.00,0.46]    |
| Parents only                           | 2884 | 0.00 [0.00,0.00]          | 0.00 [0.00,0.00]    | 0.00 [0.00,0.00]    |
| Parents and siblings/children          | 2880 | 0.06 [-0.09,0.21]         | 0.11 [-0.03,0.25]   | 0.11 [-0.03,0.24]   |

CI: Confidence Intervals.

Mean difference and 95 % CI presented.

Adjusted Model 1. Adjusted for age, sex, current education, part-time work, mental well-being at baseline, moving, and geographical region.

Adjusted Model 2. Adjusted model 1, additionally mutually adjusted for other housing conditions

**eTable 2.** Onset of low mental well-being (No. = 6537)

|                                        | no.      | OR (95% CI)      |                  |                  |
|----------------------------------------|----------|------------------|------------------|------------------|
|                                        |          | Crude Model      | Adjusted model 1 | Adjusted model 2 |
| <b>Direct access to outdoor spaces</b> |          |                  |                  |                  |
| None                                   | 56/246   | 1.97 [1.44,2.70] | 2.17 [1.54,3.05] | 1.68 [1.15,2.47] |
| Common yard                            | 75/402   | 1.54 [1.18,2.01] | 1.60 [1.20,2.15] | 1.35 [0.98,1.86] |
| Balcony                                | 64/390   | 1.32 [0.99,1.75] | 1.39 [1.03,1.89] | 1.19 [0.86,1.65] |
| Garden                                 | 499/3842 | 1.00 [1.00,1.00] | 1.00 [1.00,1.00] | 1.00 [1.00,1.00] |
| Multiple outdoor spaces                | 218/1657 | 1.01 [0.86,1.20] | 1.07 [0.89,1.27] | 1.00 [0.83,1.21] |
| <b>Urban</b>                           |          |                  |                  |                  |
| Urban                                  | 348/2392 | 1.15 [0.98,1.35] | 1.27 [1.05,1.54] | 1.16 [0.95,1.41] |
| Semi-urban                             | 210/1394 | 1.20 [1.00,1.44] | 1.20 [0.97,1.47] | 1.19 [0.97,1.46] |
| Rural                                  | 354/2751 | 1.00 [1.00,1.00] | 1.00 [1.00,1.00] | 1.00 [1.00,1.00] |
| <b>Household density</b>               |          |                  |                  |                  |
| Below median                           | 445/3528 | 1.00 [1.00,1.00] | 1.00 [1.00,1.00] | 1.00 [1.00,1.00] |
| Above median                           | 467/3009 | 1.27 [1.11,1.46] | 1.25 [1.08,1.45] | 1.23 [1.05,1.43] |
| <b>Household composition</b>           |          |                  |                  |                  |
| Alone                                  | 79/369   | 1.70 [1.29,2.23] | 1.83 [1.35,2.47] | 1.47 [1.05,2.07] |
| Roomies/friends                        | 64/366   | 1.32 [0.98,1.77] | 1.57 [1.14,2.15] | 1.26 [0.88,1.80] |
| Partner                                | 106/710  | 1.09 [0.86,1.38] | 1.11 [0.86,1.43] | 0.98 [0.74,1.28] |
| Parents only                           | 351/2535 | 1.00 [1.00,1.00] | 1.00 [1.00,1.00] | 1.00 [1.00,1.00] |
| Parents and siblings/children          | 312/2557 | 0.86 [0.73,1.02] | 0.84 [0.71,1.00] | 0.85 [0.72,1.01] |

OR: Odds Ratio, CI: Confidence Intervals.

OR and 95 % CI presented.

Adjusted Model 1. Adjusted for age, sex, current education, part-time work, mental well-being at baseline, moving, and geographical region.

Adjusted Model 2. Adjusted model 1, additionally mutually adjusted for other housing conditions

Participants with low mental well-being scores at baseline excluded (no. = 912).

Mental well-being scores  $\leq 20$  points on the SWEMWBS indicate possible or probable depression or anxiety.

**eTable 3.** Changes in QoL (No. = 7445)

|                                        | no.  | Mean differenc (95 % CI) |                     |                     |
|----------------------------------------|------|--------------------------|---------------------|---------------------|
|                                        |      | Crude Model              | Adjusted model 1    | Adjusted model 2    |
| <b>Direct access to outdoor spaces</b> |      |                          |                     |                     |
| None                                   | 286  | 0.19 [-0.06,0.45]        | -0.19 [-0.43,0.04]  | -0.18 [-0.43,0.07]  |
| Common yard                            | 464  | 0.28 [0.08,0.49]         | 0.13 [-0.06,0.32]   | 0.11 [-0.10,0.31]   |
| Balcony                                | 459  | 0.07 [-0.14,0.28]        | -0.09 [-0.28,0.10]  | -0.12 [-0.32,0.08]  |
| Garden                                 | 4346 | 0.00 [0.00,0.00]         | 0.00 [0.00,0.00]    | 0.00 [0.00,0.00]    |
| Multiple outdoor spaces                | 1889 | 0.21 [0.09,0.32]         | 0.11 [0.00,0.21]    | 0.10 [-0.01,0.20]   |
| <b>Urban</b>                           |      |                          |                     |                     |
| Urban                                  | 2698 | 0.03 [-0.08,0.14]        | -0.06 [-0.17,0.06]  | -0.07 [-0.19,0.04]  |
| Semi-urban                             | 1602 | 0.02 [-0.11,0.15]        | -0.02 [-0.14,0.10]  | -0.01 [-0.13,0.11]  |
| Rural                                  | 3145 | 0.00 [0.00,0.00]         | 0.00 [0.00,0.00]    | 0.00 [0.00,0.00]    |
| <b>Household density</b>               |      |                          |                     |                     |
| Below median                           | 3988 | 0.00 [0.00,0.00]         | 0.00 [0.00,0.00]    | 0.00 [0.00,0.00]    |
| Above median                           | 3457 | -0.05 [-0.15,0.04]       | -0.18 [-0.26,-0.09] | -0.21 [-0.30,-0.12] |
| <b>Household composition</b>           |      |                          |                     |                     |
| Alone                                  | 436  | 0.04 [-0.17,0.26]        | -0.26 [-0.45,-0.06] | -0.22 [-0.43,-0.00] |
| Roomies/friends                        | 410  | 0.08 [-0.14,0.31]        | -0.02 [-0.22,0.19]  | 0.06 [-0.16,0.29]   |
| Partner                                | 835  | 0.36 [0.20,0.53]         | 0.32 [0.17,0.47]    | 0.35 [0.18,0.51]    |
| Parents only                           | 2884 | 0.00 [0.00,0.00]         | 0.00 [0.00,0.00]    | 0.00 [0.00,0.00]    |
| Parents and siblings/children          | 2880 | -0.06 [-0.17,0.05]       | 0.01 [-0.09,0.11]   | 0.01 [-0.09,0.10]   |

QoL: Quality of Life, CI: Confidence Intervals.  
Mean difference and 95 % CI.  
Adjusted Model 1. Adjusted for age, sex, current education, part-time work, QoL at baseline, moving, and geographical region.  
Adjusted Model 2. Adjusted model 1, additionally mutually adjusted for other housing conditions

**eTable 4.** Onset of low QoL (No. = 6283)

|                                                                                                                                                                                                                                                                                                                                                                                                                            | no.       | OR (95 % CI)     |                  |                  |
|----------------------------------------------------------------------------------------------------------------------------------------------------------------------------------------------------------------------------------------------------------------------------------------------------------------------------------------------------------------------------------------------------------------------------|-----------|------------------|------------------|------------------|
|                                                                                                                                                                                                                                                                                                                                                                                                                            |           | Crude Model      | Adjusted model 1 | Adjusted model 2 |
| <b>Direct access to outdoor spaces</b>                                                                                                                                                                                                                                                                                                                                                                                     |           |                  |                  |                  |
| None                                                                                                                                                                                                                                                                                                                                                                                                                       | 78/218    | 1.10 [0.83,1.46] | 1.25 [0.92,1.69] | 1.13 [0.81,1.58] |
| Common yard                                                                                                                                                                                                                                                                                                                                                                                                                | 113/385   | 0.82 [0.65,1.03] | 0.88 [0.69,1.12] | 0.84 [0.64,1.09] |
| Balcony                                                                                                                                                                                                                                                                                                                                                                                                                    | 131/379   | 1.04 [0.83,1.30] | 1.10 [0.87,1.39] | 1.06 [0.83,1.37] |
| Garden                                                                                                                                                                                                                                                                                                                                                                                                                     | 1250/3716 | 1.00 [1.00,1.00] | 1.00 [1.00,1.00] | 1.00 [1.00,1.00] |
| Multiple outdoor spaces                                                                                                                                                                                                                                                                                                                                                                                                    | 437/1585  | 0.75 [0.66,0.85] | 0.81 [0.71,0.92] | 0.80 [0.69,0.92] |
| <b>Urban</b>                                                                                                                                                                                                                                                                                                                                                                                                               |           |                  |                  |                  |
| Urban                                                                                                                                                                                                                                                                                                                                                                                                                      | 706/2273  | 0.93 [0.82,1.05] | 1.02 [0.88,1.18] | 1.03 [0.88,1.19] |
| Semi-urban                                                                                                                                                                                                                                                                                                                                                                                                                 | 433/1345  | 0.98 [0.85,1.13] | 0.99 [0.84,1.15] | 0.98 [0.84,1.14] |
| Rural                                                                                                                                                                                                                                                                                                                                                                                                                      | 870/2665  | 1.00 [1.00,1.00] | 1.00 [1.00,1.00] | 1.00 [1.00,1.00] |
| <b>Household density</b>                                                                                                                                                                                                                                                                                                                                                                                                   |           |                  |                  |                  |
| Below median                                                                                                                                                                                                                                                                                                                                                                                                               | 1056/3424 | 1.00 [1.00,1.00] | 1.00 [1.00,1.00] | 1.00 [1.00,1.00] |
| Above median                                                                                                                                                                                                                                                                                                                                                                                                               | 953/2859  | 1.12 [1.01,1.25] | 1.14 [1.02,1.28] | 1.16 [1.03,1.30] |
| <b>Household composition</b>                                                                                                                                                                                                                                                                                                                                                                                               |           |                  |                  |                  |
| Alone                                                                                                                                                                                                                                                                                                                                                                                                                      | 121/338   | 1.17 [0.93,1.49] | 1.37 [1.06,1.78] | 1.38 [1.04,1.83] |
| Roomies/friends                                                                                                                                                                                                                                                                                                                                                                                                            | 106/340   | 0.95 [0.75,1.22] | 1.08 [0.83,1.41] | 1.08 [0.81,1.45] |
| Partner                                                                                                                                                                                                                                                                                                                                                                                                                    | 195/677   | 0.85 [0.71,1.03] | 0.85 [0.69,1.04] | 0.86 [0.70,1.07] |
| Parents only                                                                                                                                                                                                                                                                                                                                                                                                               | 786/2442  | 1.00 [1.00,1.00] | 1.00 [1.00,1.00] | 1.00 [1.00,1.00] |
| Parents and siblings/children                                                                                                                                                                                                                                                                                                                                                                                              | 801/2486  | 1.00 [0.89,1.13] | 1.00 [0.88,1.13] | 1.00 [0.88,1.14] |
| <p>QoL: Quality of Life, OR: Odds Ratios, CI: Confidence Intervals.<br/> OR and 95 % CI presented.<br/> Adjusted model 1. Adjusted for age, sex, current education, part-time work, QoL at baseline, moving, and geographical region.<br/> Adjusted model 2. Adjusted model 1, additionally mutually adjusted for other housing conditions<br/> Participants with low quality of life at baseline excluded (no. =1162)</p> |           |                  |                  |                  |

**eTable 5.** Onset of loneliness (No. = 6418)

|                                        | no.<br>cases/no. | OR (95 % CI)     |                  |                  |
|----------------------------------------|------------------|------------------|------------------|------------------|
|                                        |                  | Crude Model      | Adjusted model 1 | Adjusted model 2 |
| <b>Direct access to outdoor spaces</b> |                  |                  |                  |                  |
| None                                   | 64/234           | 1.56 [1.16,2.11] | 1.82 [1.34,2.48] | 1.44 [1.01,2.04] |
| Common yard                            | 74/394           | 0.96 [0.74,1.25] | 1.05 [0.80,1.38] | 0.98 [0.73,1.34] |
| Balcony                                | 89/378           | 1.28 [1.00,1.64] | 1.41 [1.09,1.83] | 1.37 [1.04,1.82] |
| Garden                                 | 736/3793         | 1.00 [1.00,1.00] | 1.00 [1.00,1.00] | 1.00 [1.00,1.00] |
| Multiple outdoor spaces                | 295/1619         | 0.93 [0.80,1.07] | 0.99 [0.85,1.15] | 0.97 [0.83,1.13] |
| <b>Urban</b>                           |                  |                  |                  |                  |
| Urban                                  | 454/2315         | 1.01 [0.88,1.16] | 1.04 [0.88,1.22] | 1.00 [0.85,1.19] |
| Semi-urban                             | 276/1383         | 1.04 [0.88,1.22] | 1.04 [0.87,1.24] | 1.02 [0.85,1.21] |
| Rural                                  | 528/2720         | 1.00 [1.00,1.00] | 1.00 [1.00,1.00] | 1.00 [1.00,1.00] |
| <b>Household density</b>               |                  |                  |                  |                  |
| Below median                           | 638/3473         | 1.00 [1.00,1.00] | 1.00 [1.00,1.00] | 1.00 [1.00,1.00] |
| Above median                           | 620/2945         | 1.18 [1.05,1.34] | 1.21 [1.07,1.37] | 1.30 [1.14,1.48] |
| <b>Household composition</b>           |                  |                  |                  |                  |
| Alone                                  | 121/362          | 1.94 [1.53,2.46] | 2.37 [1.84,3.06] | 2.12 [1.59,2.82] |
| Roomies/friends                        | 51/352           | 0.65 [0.48,0.89] | 0.74 [0.54,1.03] | 0.66 [0.47,0.94] |
| Partner                                | 111/698          | 0.73 [0.58,0.91] | 0.77 [0.61,0.98] | 0.72 [0.56,0.92] |
| Parents only                           | 514/2498         | 1.00 [1.00,1.00] | 1.00 [1.00,1.00] | 1.00 [1.00,1.00] |
| Parents and siblings/children          | 461/2508         | 0.87 [0.76,1.00] | 0.85 [0.74,0.98] | 0.86 [0.74,0.99] |

OR: Odds Ratios, CI: Confidence Intervals.

OR and 95 % CI presented.

Adjusted Model 1. Adjusted for age, sex, current education, part-time work, loneliness at baseline, moving, and geographical region.

Adjusted Model 2. Adjusted model 1, additionally mutually adjusted for other housing conditions

Participants with loneliness at baseline excluded (no. = 1027)

**eTable 6.** Changes in mental well-being, quality of life and loneliness, stratified by sex (No.= 7445)

|                               | Female        |                           | Male          |                           |
|-------------------------------|---------------|---------------------------|---------------|---------------------------|
|                               | no.           | Mean difference (95 % CI) | no.           | Mean difference (95 % CI) |
| <b>Mental well-being</b>      |               |                           |               |                           |
| <b>Household density</b>      |               |                           |               |                           |
| Below median                  | 2816          | 0.00 [0.00,0.00]          | 1171          | 0.00 [0.00,0.00]          |
| Above median                  | 2397          | -0.27 [-0.42,-0.12]       | 1060          | -0.36 [-0.60,-0.13]       |
| <b>Household composition</b>  |               |                           |               |                           |
| Alone                         | 278           | -0.02 [-0.39,0.35]        | 158           | -0.63 [-1.15,-0.10]       |
| Roomies/friends               | 267           | 0.40 [0.02,0.78]          | 143           | -0.32 [-0.87,0.23]        |
| Partner                       | 655           | 0.24 [-0.02,0.50]         | 180           | 0.29 [-0.18,0.76]         |
| Parents only                  | 1971          | 0.00 [0.00,0.00]          | 913           | 0.00 [0.00,0.00]          |
| Parents and siblings/children | 2042          | 0.21 [0.05,0.38]          | 838           | -0.13 [-0.39,0.12]        |
| <b>QoL</b>                    | no.           | Mean difference (95 % CI) | no.           | Mean difference (95 % CI) |
| <b>Household composition</b>  |               |                           |               |                           |
| Alone                         | 278           | -0.35 [-0.62,-0.08]       | 158           | 0.07 [-0.28,0.42]         |
| Roomies/friends               | 267           | 0.17 [-0.11,0.44]         | 143           | -0.11 [-0.48,0.25]        |
| Partner                       | 655           | 0.38 [0.19,0.57]          | 180           | 0.19 [-0.12,0.51]         |
| Parents only                  | 1971          | 0.00 [0.00,0.00]          | 913           | 0.00 [0.00,0.00]          |
| Parents and siblings/children | 2042          | -0.01 [-0.13,0.11]        | 838           | 0.05 [-0.12,0.22]         |
| <b>Loneliness<sup>a</sup></b> | no. cases/no. | OR (95 % CI)              | no. cases/no. | OR (95 % CI)              |
| <b>Household composition</b>  |               |                           |               |                           |
| Alone                         | 116/278       | 1.81 [1.28,2.56]          | 48/158        | 3.15 [1.85,5.36]          |
| Roomies/friends               | 61/267        | 0.68 [0.45,1.02]          | 19/143        | 0.60 [0.28,1.29]          |
| Partner                       | 137/655       | 0.74 [0.56,0.97]          | 12/180        | 0.52 [0.26,1.04]          |
| Parents only                  | 563/1971      | 1.00 [1.00,1.00]          | 125/913       | 1.00 [1.00,1.00]          |
| Parents and siblings/children | 490/2042      | 0.74 [0.62,0.87]          | 150/838       | 1.40 [1.04,1.87]          |

CI: Confidence Interval, OR: Odds Ratio, QoL: Quality of Life.

Mean difference and 95 % CI and OR and 95 % CI presented.

Results displayed for interaction terms for which the likelihood ratio test indicated interaction ( $p < 0.2$ ).

Adjusted Model 2: Adjusted for age, sex, current education, part-time work, mental well-being/QoL/loneliness at baseline, moving, and geographical region, and additionally mutually adjusted for housing conditions.

<sup>a</sup>Participants with loneliness at baseline excluded (no. = 1023)

**eTable 7.** Joint effects of housing conditions and quarantine on changes in mental well-being, quality of life and loneliness (No. = 7418)

|                                        | no.               | Mean difference (95 % CI) |                     |
|----------------------------------------|-------------------|---------------------------|---------------------|
|                                        |                   | Mental well-being         | QoL                 |
| <b>Direct access to outdoor spaces</b> |                   |                           |                     |
| No access, NQ                          | <i>b</i>          | -0.98 [-1.38,-0.58]       | N/A                 |
| No access, Q                           | <i>b</i>          | -0.48 [-1.12,0.16]        | N/A                 |
| Common yard, NQ                        | <i>b</i>          | -0.00 [-0.32,0.32]        | N/A                 |
| Common yard, Q                         | <i>b</i>          | -0.57 [-1.08,-0.06]       | N/A                 |
| Balcony, NQ                            | <i>b</i>          | 0.02 [-0.29,0.33]         | N/A                 |
| Balcony, Q                             | <i>b</i>          | -0.42 [-0.96,0.11]        | N/A                 |
| Garden, NQ                             | <i>b</i>          | 0.00 [0.00,0.00]          | N/A                 |
| Garden, Q                              | <i>b</i>          | -0.07 [-0.26,0.12]        | N/A                 |
| Multiple outdoor spaces, NQ            | <i>b</i>          | 0.02 [-0.15,0.19]         | N/A                 |
| Multiple outdoor spaces, Q             | <i>b</i>          | -0.13 [-0.40,0.14]        | N/A                 |
| <b>Urbanity</b>                        |                   |                           |                     |
| Urban, NQ                              | 2073              | N/A                       | -0.03 [-0.16,0.10]  |
| Urban, Q                               | 615               | N/A                       | -0.21 [-0.40,-0.03] |
| Semi-urban, NQ                         | 1223              | N/A                       | 0.05 [-0.09,0.19]   |
| Semi-urban, Q                          | 373               | N/A                       | -0.19 [-0.40,0.02]  |
| Rural, NQ (referent)                   | 2355              | N/A                       | 0.00 [0.00,0.00]    |
| Rural, Q                               | 779               | N/A                       | 0.01 [-0.14,0.17]   |
| <b>Household density</b>               |                   |                           |                     |
| Below median, NQ (reference)           | 3050              | N/A                       | N/A                 |
| Below median, Q                        | 927               | N/A                       | N/A                 |
| Above median, NQ                       | 2601              | N/A                       | N/A                 |
| Above median, Q                        | 840               | N/A                       | N/A                 |
| <b>Household composition</b>           |                   |                           |                     |
| Alone, NQ                              | <i>b</i>          | -0.26 [-0.60,0.09]        | N/A                 |
| Alone, Q                               | <i>b</i>          | -0.28 [-0.81,0.25]        | N/A                 |
| Roomies/friends, NQ                    | <i>b</i>          | 0.05 [-0.30,0.41]         | N/A                 |
| Roomies/friends, Q                     | <i>b</i>          | 0.35 [-0.17,0.88]         | N/A                 |
| Partner, NQ                            | <i>b</i>          | 0.31 [0.06,0.57]          | N/A                 |
| Partner, Q                             | <i>b</i>          | -0.10 [-0.51,0.30]        | N/A                 |
| Parents only, NQ (referent)            | <i>b</i>          | 0.00 [0.00,0.00]          | N/A                 |
| Parents only, Q                        | <i>b</i>          | -0.09 [-0.32,0.15]        | N/A                 |
| Parents and siblings/children, NQ      | <i>b</i>          | 0.13 [-0.03,0.29]         | N/A                 |
| Parents and siblings/children, Q       | <i>b</i>          | -0.03 [-0.25,0.20]        | N/A                 |
| <b>Total</b>                           | 7418 <sup>a</sup> |                           |                     |

CI: Confidence Interval, OR: Odds Ratio, QoL: Quality of Life, Q: Quarantined, NQ: Not Quarantined, N/A: Not applicable. Mean difference and 95 % CI and OR and 95 % CI presented.

Results displayed for interaction terms for which the likelihood ratio test indicated interaction ( $p < 0.2$ ), otherwise N/A is displayed

Adjusted for age, sex, current education, part-time work, mental well-being/QoL, moving, and geographical region, and additionally mutually adjusted for housing conditions

<sup>a</sup>27 observations omitted due to lacking data on quarantine status

<sup>b</sup>Cells clouded to secure non-identifiability of participants



**eTable 8.** Changes in QoL, stratified by psychiatric illnesses (No. = 7418)<sup>a</sup>

|                               | No psychiatric illness |                           | Psychiatric illness |                           |
|-------------------------------|------------------------|---------------------------|---------------------|---------------------------|
|                               | no.                    | Mean difference (95 % CI) | no.                 | Mean difference (95 % CI) |
| <b>Household composition</b>  |                        |                           |                     |                           |
| Alone                         | 341                    | -0.06 [-0.30,0.18]        | 95                  | -0.09 [-0.80,0.62]        |
| Roomies/friends               | 350                    | 0.11 [-0.12,0.35]         | 60                  | -0.40 [-1.26,0.45]        |
| Partner                       | <sup>b</sup>           | 0.38 [0.20,0.55]          | <sup>b</sup>        | 0.46 [-0.17,1.10]         |
| Parents only                  | 2494                   | 0.00 [0.00,0.00]          | 377                 | 0.00 [0.00,0.00]          |
| Parents and siblings/children | <sup>b</sup>           | -0.01 [-0.11,0.10]        | <sup>b</sup>        | 0.08 [-0.35,0.50]         |
| <b>Total</b>                  | <b>6450</b>            |                           | <b>968</b>          |                           |

QoL: Quality of Life, CI: Confidence Interval.

Mean difference and 95 % CI presented.

Results displayed for interaction terms for which the likelihood ratio test indicated interaction ( $p < 0.2$ ).

Adjusted Model 2: Adjusted for age, sex, current education, part-time work, QoL at baseline, moving, and geographical region, and additionally mutually adjusted for housing conditions

<sup>a</sup>27 observations omitted due to missing data on psychiatric illnesses.

<sup>b</sup>Cells clouded to secure non-identifiability of participants

**eTable 9.** Changes in category of mental well-being (No. = 7445)

|                               | no. cases, (ref.normal to normal)<br>low to low/low to normal/normal to low | RRR (95 % CI)         |                          |                           |
|-------------------------------|-----------------------------------------------------------------------------|-----------------------|--------------------------|---------------------------|
|                               |                                                                             | Low to low<br>(6.9 %) | Low to normal<br>(5.3 %) | Normal to low<br>(12.3 %) |
| <b>Outdoor spaces</b>         |                                                                             |                       |                          |                           |
| No access                     | (ref. 190)24/16/56                                                          | 1.46 [0.88,2.40]      | 1.11 [0.62,1.99]         | 1.71 [1.19,2.45]          |
| Common yard                   | (ref. 327)31/32/74                                                          | 1.22 [0.79,1.89]      | 1.36 [0.87,2.13]         | 1.44 [1.05,1.96]          |
| Balcony                       | (ref. 326)40/29/64                                                          | 1.53 [1.04,2.26]      | 1.25 [0.80,1.94]         | 1.23 [0.90,1.68]          |
| Garden                        | (ref. 3343)295/209/499                                                      | 1.00 [1.00,1.00]      | 1.00 [1.00,1.00]         | 1.00 [1.00,1.00]          |
| Multiple facilities/other     | (ref. 1439)121/111/218                                                      | 1.03 [0.81,1.29]      | 1.27 [0.99,1.63]         | 1.03 [0.86,1.24]          |
| <b>Urbanicity</b>             |                                                                             |                       |                          |                           |
| Urban                         | (ref. 2044)160/146/348                                                      | 0.73 [0.56,0.94]      | 0.95 [0.72,1.26]         | 1.14 [0.94,1.38]          |
| Semi-urban                    | (ref. 1184)116/92/210                                                       | 0.98 [0.76,1.27]      | 1.13 [0.84,1.50]         | 1.22 [1.00,1.49]          |
| Rural                         | (ref. 2397)235/159/354                                                      | 1.00 [1.00,1.00]      | 1.00 [1.00,1.00]         | 1.00 [1.00,1.00]          |
| <b>Household density</b>      |                                                                             |                       |                          |                           |
| Above median                  | (ref. 3083)244/216/445                                                      | 1.00 [1.00,1.00]      | 1.00 [1.00,1.00]         | 1.00 [1.00,1.00]          |
| Below median                  | (ref. 2542)267/181/467                                                      | 1.37 [1.14,1.66]      | 1.01 [0.82,1.26]         | 1.26 [1.09,1.46]          |
| <b>Household composition</b>  |                                                                             |                       |                          |                           |
| Alone                         | (ref. 290)35/32/79                                                          | 1.48 [0.96,2.29]      | 1.44 [0.91,2.28]         | 1.58 [1.15,2.19]          |
| Friends/roommates             | (ref. 302)25/19/64                                                          | 1.02 [0.62,1.68]      | 0.85 [0.49,1.46]         | 1.23 [0.87,1.73]          |
| Partner                       | (ref. 604)64/61/106                                                         | 1.28 [0.92,1.78]      | 1.28 [0.90,1.82]         | 1.02 [0.78,1.33]          |
| Parents only                  | (ref. 2184)193/156/351                                                      | 1.00 [1.00,1.00]      | 1.00 [1.00,1.00]         | 1.00 [1.00,1.00]          |
| Parents and children/siblings | (ref. 2245)194/129//312                                                     | 0.97 [0.79,1.20]      | 0.81 [0.64,1.04]         | 0.84 [0.71,0.99]          |
| <b>Total (no.)</b>            | (ref.5625)511/397/912                                                       |                       |                          |                           |

RRR: Relative Risk Ratios, CI: Confidence Intervals.

RRR and 95 % CI presented.

Adjusted Model 2: Adjusted for age, sex, current education, part-time work, moving, geographical region, and mutual adjustment for housing conditions. Mental well-being at baseline omitted from model due to collinearity.

**eTable 10.** Changes in category of QoL (No. = 7445)

|                               | no. cases, (ref.normal to normal)<br>low to low/low to normal/normal to low | RRR (95 % CI)         |                          |                           |
|-------------------------------|-----------------------------------------------------------------------------|-----------------------|--------------------------|---------------------------|
|                               |                                                                             | Low to low<br>(9.5 %) | Low to normal<br>(6.1 %) | Normal to low<br>(27.1 %) |
| <b>Outdoor spaces</b>         |                                                                             |                       |                          |                           |
| No access                     | (ref. 140)37/31/78                                                          | 1.41 [0.91,2.18]      | 1.87 [1.17,3.00]         | 1.16 [0.84,1.60]          |
| Common yard                   | (ref. 272)45/35/113                                                         | 0.95 [0.65,1.38]      | 1.11 [0.72,1.71]         | 0.86 [0.66,1.12]          |
| Balcony                       | (ref. 248)46/34/131                                                         | 1.09 [0.76,1.58]      | 1.21 [0.80,1.85]         | 1.11 [0.87,1.42]          |
| Garden                        | (ref. 2466)395/235/1250                                                     | 1.00 [1.00,1.00]      | 1.00 [1.00,1.00]         | 1.00 [1.00,1.00]          |
| Multiple facilities/other     | (ref. 1148)189/115/437                                                      | 1.06 [0.87,1.30]      | 1.03 [0.81,1.32]         | 0.81 [0.71,0.93]          |
| <b>Urbanicity</b>             |                                                                             |                       |                          |                           |
| Urban                         | (ref. 1567)253/172/706                                                      | 0.88 [0.71,1.10]      | 1.05 [0.80,1.37]         | 1.04 [0.90,1.21]          |
| Semi-urban                    | (ref. 912)158/99/433                                                        | 0.98 [0.78,1.23]      | 1.10 [0.83,1.44]         | 0.99 [0.85,1.15]          |
| Rural                         | (ref. 1795)301/179/870                                                      | 1.00 [1.00,1.00]      | 1.00 [1.00,1.00]         | 1.00 [1.00,1.00]          |
| <b>Household density</b>      |                                                                             |                       |                          |                           |
| Above median                  | (ref. 2368)334/230/1056                                                     | 1.00 [1.00,1.00]      | 1.00 [1.00,1.00]         | 1.00 [1.00,1.00]          |
| Below median                  | (ref. 1906)378/220/953                                                      | 1.51 [1.28,1.79]      | 1.12 [0.91,1.37]         | 1.18 [1.06,1.32]          |
| <b>Household composition</b>  |                                                                             |                       |                          |                           |
| Alone                         | (ref. 217)64/34/121                                                         | 2.14 [1.49,3.08]      | 1.49 [0.95,2.35]         | 1.39 [1.06,1.83]          |
| Friends/roommates             | (ref. 234)40/30/106                                                         | 1.15 [0.76,1.73]      | 1.38 [0.87,2.20]         | 1.05 [0.79,1.40]          |
| Partner                       | (ref. 482)81/77/195                                                         | 1.05 [0.78,1.42]      | 1.54 [1.11,2.14]         | 0.84 [0.68,1.04]          |
| Parents only                  | (ref. 1656)281/161/786                                                      | 1.00 [1.00,1.00]      | 1.00 [1.00,1.00]         | 1.00 [1.00,1.00]          |
| Parents and children/siblings | (ref. 1685)246/148/801                                                      | 0.84 [0.70,1.01]      | 0.90 [0.72,1.14]         | 0.98 [0.87,1.11]          |
| <b>Total (no.)</b>            | (ref. 4274)712/450/2009                                                     |                       |                          |                           |

QoL: Quality of Life, RRR: Relative Risk Ratios, CI: Confidence Intervals.

RRR and 95 % CI presented.

Adjusted model 2: Adjusted for age, sex, current education, part-time work, moving, geographical region, and mutual adjustment for housing conditions. QoL at baseline omitted from model due to collinearity.

**eTable 11.** Changes in category of loneliness (No. = 7445)

| no. cases, (ref.not lonely to not lonely)<br>lonely to lonely/lonely to not lonely/not lonely to<br>lonely | RRR (95 % CI)                |                                 |                                 |
|------------------------------------------------------------------------------------------------------------|------------------------------|---------------------------------|---------------------------------|
|                                                                                                            | Lonely to lonely<br>(16.9 %) | Lonely to not lonely<br>(7.6 %) | Not lonely to lonely<br>(6.1 %) |
| <b>Outdoor spaces</b>                                                                                      |                              |                                 |                                 |
| No access (ref. 170)26/26/64                                                                               | 1.91 [1.16,3.16]             | 1.41 [0.87,2.27]                | 1.44 [1.02,2.03]                |
| Common yard (ref. 320)39/32/74                                                                             | 1.63 [1.08,2.48]             | 0.94 [0.62,1.44]                | 0.98 [0.73,1.33]                |
| Balcony (ref. 289)28/53/89                                                                                 | 1.31 [0.84,2.04]             | 1.75 [1.23,2.48]                | 1.35 [1.02,1.78]                |
| Garden (ref. 3057)255/298/736                                                                              | 1.00 [1.00,1.00]             | 1.00 [1.00,1.00]                | 1.00 [1.00,1.00]                |
| Multiple facilities/other (ref. 1324)115/155/295                                                           | 1.15 [0.90,1.46]             | 1.21 [0.98,1.51]                | 0.97 [0.83,1.13]                |
| <b>Urbanicity</b>                                                                                          |                              |                                 |                                 |
| Urban (ref. 1861)169/214/454                                                                               | 1.00 [0.77,1.30]             | 0.96 [0.76,1.23]                | 1.01 [0.85,1.20]                |
| Semi-urban (ref.1107)99/120/276                                                                            | 1.01 [0.77,1.33]             | 0.98 [0.76,1.26]                | 1.02 [0.85,1.21]                |
| Rural (ref.2192)195/230/528                                                                                | 1.00 [1.00,1.00]             | 1.00 [1.00,1.00]                | 1.00 [1.00,1.00]                |
| <b>Household density</b>                                                                                   |                              |                                 |                                 |
| Above median (ref. 2835)238/277/638                                                                        | 1.00 [1.00,1.00]             | 1.00 [1.00,1.00]                | 1.00 [1.00,1.00]                |
| Below median (ref. 2325)225/287/620                                                                        | 1.19 [0.98,1.46]             | 1.23 [1.03,1.48]                | 1.29 [1.13,1.46]                |
| <b>Household composition</b>                                                                               |                              |                                 |                                 |
| Alone (ref. 241)43/31/121                                                                                  | 1.88 [1.23,2.89]             | 1.23 [0.79,1.92]                | 2.10 [1.58,2.79]                |
| Friends/roommates (ref. 301)29/29/51                                                                       | 1.01 [0.63,1.61]             | 0.83 [0.52,1.31]                | 0.66 [0.47,0.94]                |
| Partner (ref. 587)38/99/111                                                                                | 0.63 [0.42,0.94]             | 1.48 [1.11,1.97]                | 0.72 [0.56,0.92]                |
| Parents only (ref. 1984)174/212//514                                                                       | 1.00 [1.00,1.00]             | 1.00 [1.00,1.00]                | 1.00 [1.00,1.00]                |
| Parents and children/siblings (ref. 2047)179/193/461                                                       | 0.99 [0.79,1.23]             | 0.89 [0.72,1.09]                | 0.86 [0.74,0.99]                |
| <b>Total (no.)</b> (ref. 5160)463/564/1258                                                                 |                              |                                 |                                 |

RRR: Relative Risk Ratios, CI: Confidence Intervals.

RRR and 95 % CI presented.

Adjusted model 2: Adjusted for age, sex, current education, part-time work, moving, geographical region, and mutual adjustment for housing conditions. Loneliness at baseline omitted from model due to collinearity.

eFigure 1. Flow of participation

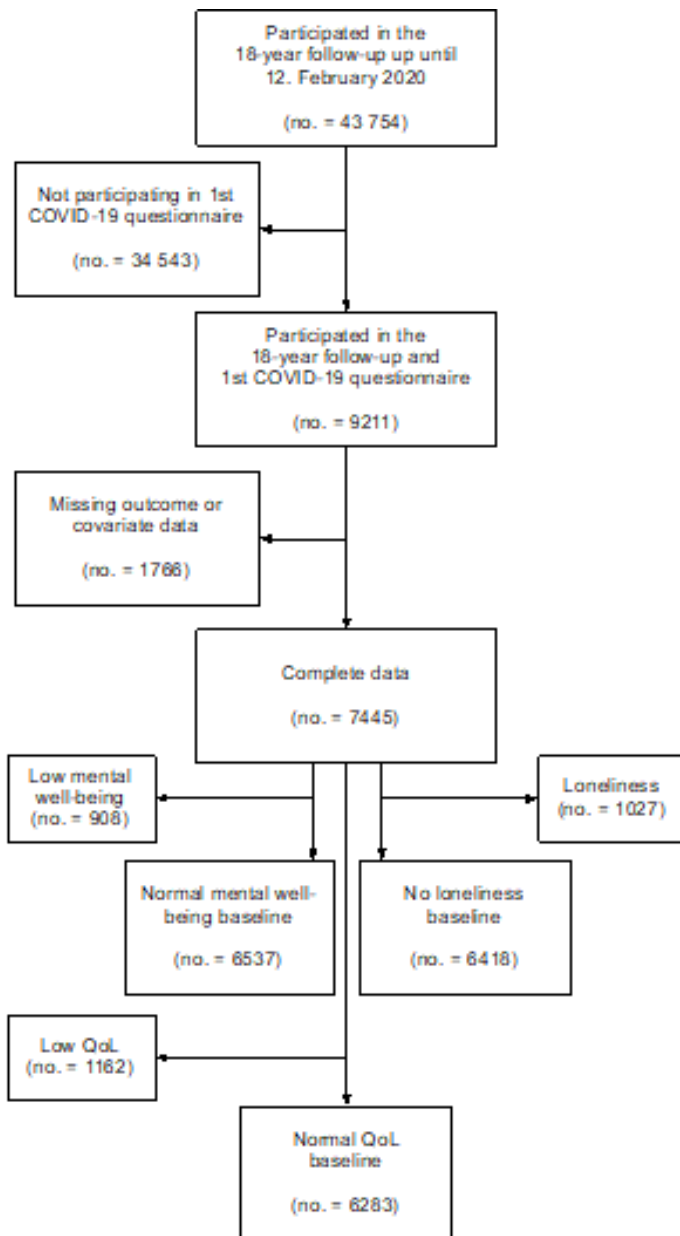

Supplement: Supplementary file [file media-1.pdf]
